# Supplementary material
Source: publisher site journal article supplement (https://www.dovepress.com/get_supplementary_file.php?f=237056.docx)
Supplement: Supplementary file 1 [file get_supplementary_file.php]

**Supplementary materials: Full detail table 2** Multilevel linear regression model predicting BPI maximum pain (MMSE 10-30)

| **Random intercept linear regression multilevel model a for maximum pain** | ***(a) Null model*** | | ***(b) Timexgroup model*** | | ***(c) Resident characteristics model*** | | ***(d) Resident characteristics and secondary outcomes model*** | | ***(e) Resident and nursing home-level model*** | |
| --- | --- | --- | --- | --- | --- | --- | --- | --- | --- | --- |
|  | Estimate (SE) | p | Estimate (SE) | p | Estimate (SE) | p | Estimate (SE) | p | Estimate (SE) | p |
| *Fixed model part* b |  |  |  |  |  |  |  |  |  |  |
| Intercept | **3.20 (0.22)** | **<0.001** | **3.78 (0.40)** | **<0.001** | **2.81 (0.92)** | **<0.001** | **3.33 (0.94)** | **<0.001** | **3.55 (0.94)** | **<0.001** |
| Timexgroup |  |  | 0.78 (0.45) | 0.087T | 0.65 (0.42) | 0.128 | **1.09 (0.47)** | **0.025** | **1.32 (0.42)** | **0.006** |
| *Resident-level* c |  |  |  |  |  |  |  |  |  |  |
| *Resident characteristics* |  |  |  |  |  |  |  |  |  |  |
| Gender (ref.: female) |  |  |  |  | -0.44 (0.39) | 0.273 | -0.06 (0.40) | 0.889 | -0.09 (0.40) | 0.821 |
| Age |  |  |  |  | 0.01 (0.02) | 0.824 | 0.02 (0.03) | 0.236 | 0.02 (0.02) | 0.319 |
| Mini-Mental State Examination |  |  |  |  | 0.06 (0.03) | 0.087T | 0.02 (0.03) | 0.536 | 0.02 (0.03) | 0.563 |
| *Diagnoses* |  |  |  |  |  |  |  |  |  |  |
| Dementia (ref.: not present) |  |  |  |  | **-1.41 (0.39)** | **<0.001** | **-1.26 (0.41)** | **0.002** | **-1.12 (0.42)** | **0.008** |
| Depression (ref.: not present) |  |  |  |  | -0.14 (0.44) | 0.749 | -0.05 (0.43) | 0.906 | -0.11 (0.43) | 0.807 |
| Musculoskeletal (ref.: not present) |  |  |  |  | 0.69 (0.37) | 0.063T | 0.45 (0.38) | 0.233 | 0.46 (0.37) | 0.216 |
| Neuropathies (ref.: not present) |  |  |  |  | -0.43 (0.58) | 0.459 | -0.37 (0.58) | 0.520 | -0.39 (0.58) | 0.502 |
| Tumor (ref.: not present) |  |  |  |  | 0.46 (0.49) | 0.351 | 0.34 (0.50) | 0.505 | 0.39 (0.50) | 0.432 |
| *Secondary outcomes* |  |  |  |  |  |  |  |  |  |  |
| Geriatric Depression Scale |  |  |  |  |  |  | 0.09 (0.06) | 0.121 | 0.08 (0.06) | 0.139 |
| EQ-5D Quality of Life |  |  |  |  |  |  | **-0.07 (0.01)** | **<0.001** | **-0.07 (0.01)** | **<0.001** |
| *Nursing home-level* b |  |  |  |  |  |  |  |  |  |  |
| Size in terms of resident care places |  |  |  |  |  |  |  |  | 0.01 (0.01) | 0.311 |
| Number of registered practical nurses |  |  |  |  |  |  |  |  | -0.07 (0.03) | 0.076T |
| Number of nursing assistants |  |  |  |  |  |  |  |  | 0.07 (0.04) | 0.148 |
| *Random model part* d |  |  |  |  |  |  |  |  |  |  |
| Resident-level | 13.42 (0.91) | <0.001 | 13.37 (0.91) | <0.001 | 12.81 (0.88) | <0.001 | 9.93 (0.78) | <0.001 | 9.90 (0.78) | <0.001 |
| Nursing home-level | 0.35 (0.32) | 0.278 | 0.28 (0.29) | 0.326 | 0.12 (0.23) | 0.592 | 0.39 (0.33) | 0.303 | 0.20 (0.28) | 0.472 |
| ICC | 0.0254 | | 0.0205 | | 0.0093 | | 0.0378 | | 0.0300 | |
| -2LL | 2,448.46 | | 2,445.24 | | 2,403.47 | | 1,800.54 | | 1,811.96 | |
| Sample size, nursing homes | 15 | | 15 | | 15 | | 15 | | 15 | |
| Sample size, residents | 449 | | 449 | | 446 | | 347 | | 347 | |
| *Notes: a Restricted maximum likelihood method, b Fixed effects estimates: increase/decrease of maximum pain if explanatory variable increases by one unit , c Grand mean centering, d Random effects estimates: unexplained variance components; T p<0.10; SE standard error, p p-value, ref reference category, ICC intraclass correlation coefficient, -2LL log-likelihood ratio; bold font indicates statistical significance (p<0.05)* | | | | | | | | | | |

**Full detail table 3** Multilevel logistic regression model predicting PAINAD above cut-off (MMSE 0-9)

| **Random intercept multilevel logistic regression model a for PAINAD** | ***(a) Null model*** | | ***(b) Timexgroup model*** | | ***(c) Resident characteristics model*** | | ***(d) Resident characteristics and secondary outcomes model*** | | ***(e) Resident and nursing home-level model*** | |
| --- | --- | --- | --- | --- | --- | --- | --- | --- | --- | --- |
|  | OR [CI] | p | OR [CI] | p | OR [CI] | p | OR [CI] | p | OR [CI] | p |
| *Fixed model part* |  |  |  |  |  |  |  |  |  |  |
| Intercept b | 0.33 (0.22) | 0.129 | 0.31 (0.25) | 0.214 | 1.31 (1.36) | 0.339 | 0.76 (1.84) | 0.681 | 2.01 (1.86) | 0.281 |
| Timexgroup |  |  | 1.08 [0.74-1.58] | 0.685 | 0.92 [0.65-1.31] | 0.647 | 1.03 [0.63-1.68] | 0.913 | 0.89 [0.46-1.72] | 0.724 |
| *Resident-level* |  |  |  |  |  |  |  |  |  |  |
| *Resident characteristics* |  |  |  |  |  |  |  |  |  |  |
| Gender (ref.: female) |  |  |  |  | 0.70 [0.38-1.28] | 0.696 | 0.76 [0.44-1.32] | 0.327 | 0.77 [0.44-1.35] | 0.360 |
| Age |  |  |  |  | 0.99 [0.96-1.03] | 0.789 | 1.01 [0.94-1.04] | 0.935 | 1.01 [0.96-1.05] | 0.885 |
| Mini-Mental State Examination |  |  |  |  | **0.92 [0.86-0.99]** | **0.029** | **0.92 [0.85-0.98]** | **0.024** | **0.92 [0.86-0.99]** | **0.034** |
| *Diagnoses* |  |  |  |  |  |  |  |  |  |  |
| Dementia (ref.: not present) |  |  |  |  | 0.75 [0.44-1.27] | 0.286 | 0.70 [0.43-1.14] | 0.151 | 0.76 [0.46-1.27] | 0.292 |
| Depression (ref.: not present) |  |  |  |  | 1.19 [0.67-2.12] | 0.561 | 1.31 [0.65-2.65] | 0.455 | 1.34 [0.64-2.82] | 0.443 |
| Musculoskeletal (ref.: not present) |  |  |  |  | 1.26 [0.78-2.10] | 0.381 | 1.14 [0.63-2.09] | 0.662 | 1.08 [0.58-1.99] | 0.814 |
| Neuropathies (ref.: not present) |  |  |  |  | 1.36 [0.34-5.47] | 0.666 | 1.28 [0.25-6.55] | 0.765 | 1.55 [0.28-8.56] | 0.612 |
| Tumor (ref.: not present) |  |  |  |  | 1.30 [0.67-2.53] | 0.436 | 1.36 [0.75-2.48] | 0.586 | 1.29 [0.69-2.43] | 0.417 |
| *Secondary outcomes* |  |  |  |  |  |  |  |  |  |  |
| Neuropsychiatric Inventory Index |  |  |  |  |  |  | 1.04 [0.91-1.19] | 0.586 | 1.06 [0.91-1.23] | 0.440 |
| *Nursing home-level* |  |  |  |  |  |  |  |  |  |  |
| Size in terms of resident care places |  |  |  |  |  |  |  |  | 0.99 [0.98-1.01] | 0.440 |
| Number of registered practical nurses |  |  |  |  |  |  |  |  | **0.94 [0.89-0.99]** | **0.049** |
| Number of nursing assistants |  |  |  |  |  |  |  |  | 1.05 [0.99-1.12] | 0.123 |
| *Random model part* |  |  |  |  |  |  |  |  |  |  |
| Nursing home-level b | 0.45 (0.30) | 0.136 | 0.45 (0.31) | 0.147 | 0.39 (0.29) | 0.173 | 0.27 (0.24) | 0.262 | 0.15 (0.24) | 0.545 |
| ICCc | 0.1201 | | 0.1203 | | 0.1077 | | 0.0761 | | 0.0430 | |
| -2LL | 1,155.68 | | 1,156.29 | | 1,149.51 | | 983.39 | | 1,008.21 | |
| Sample size, nursing homes | 15 | | 15 | | 15 | | 15 | | 15 | |
| Sample size, residents | 268 | | 268 | | 261 | | 222 | | 222 | |
| *Notes: a Robust covariances method; b average log-odds (SE standard error); c latent variable approach; PAINAD Pain Assessment in Advanced Dementia, OR Odds ratio, CI 95%-confidence interval, p p-value, ref reference, ICC intraclass correlation coefficient, -2LL log-likelihood ratio; bold font indicates statistical significance (p<0.05)* | | | | | | | | | | |
